# Supplementary material
Source: Springer Nature journal article supplement (https://www.springermedizin.de/resource/supplementary/12889_2011_3289_MOESM2_ESM.pdf/9488586)
Supplement: MOESM2 [file 9488586]

Recruitment and  
Consent to TEGH

First Assessment (TEGH)  
Demographics and Baseline  
measures  
administered

Second Assessment  
(SickKids)  
Metabolic testing

Randomization

MI  
+  
Usual  
Care

Control  
+  
Usual  
Care

6 mo  
Assessment

12 mo  
Assessment
